# Supplementary material for: Low Prevalence of Cysticercosis and Trichinella Infection in Pigs in Rural Cambodia
Source: MDPI journal article supplement (doi:10.3390/tropicalmed6020100), 2021-06-11
Supplement: s1 [file s1]

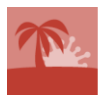

# The Supplementary of Low Prevalence of Cysticercosis and *Trichinella* Infection in Pigs in Rural Cambodia

## Questionnaire/

☐ Used for questions with only one possible answer/

☐ Used for questions with more than one possible answers/

Farm no/ : .....

| No | A. Household demographics/                |                         |                       |  |
|----|-------------------------------------------|-------------------------|-----------------------|--|
| A1 | Geographic location                       | Province/ : .....       |                       |  |
|    |                                           | District/ : .....       |                       |  |
|    |                                           | Commune/ : .....        |                       |  |
|    |                                           | Village/ : .....        |                       |  |
| A2 | Sex of respondent                         | Female /                | <input type="radio"/> |  |
|    |                                           | Male/                   | <input type="radio"/> |  |
| A3 | Age of respondent/                        | ..... years/            |                       |  |
| A4 | Highest level of education of respondent/ | College/University /    | <input type="radio"/> |  |
|    |                                           | Upper secondary school/ | <input type="radio"/> |  |
|    |                                           | Lower secondary school/ | <input type="radio"/> |  |
|    |                                           | Primary school/         | <input type="radio"/> |  |
|    |                                           | No education/           | <input type="radio"/> |  |

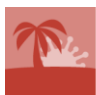

|           |                                                       |                                  |                          |                 |
|-----------|-------------------------------------------------------|----------------------------------|--------------------------|-----------------|
| <b>A5</b> | Number of people living in the household              | Adults/ : (15-60 years): .....   |                          |                 |
|           |                                                       | Children/ (< 15 years): .....    |                          |                 |
|           |                                                       | Elderly/ (> 60 years): .....     |                          |                 |
| <b>No</b> | <b>B. Food and hygiene habits/ /</b>                  |                                  |                          |                 |
| <b>B1</b> | Do you eat pork meat in the family?<br>?              | Yes /                            | <input type="radio"/>    | <b>Go to B8</b> |
|           |                                                       | No/                              | <input type="radio"/>    |                 |
| <b>B2</b> | If yes, how often?<br>,                               | Every day /                      | <input type="radio"/>    |                 |
|           |                                                       | 2-5 times/week/ - /              | <input type="radio"/>    |                 |
|           |                                                       | Once a week/                     | <input type="radio"/>    |                 |
|           |                                                       | 2-3 times/month/ - /             | <input type="radio"/>    |                 |
|           |                                                       | Once a month/                    | <input type="radio"/>    |                 |
|           |                                                       | Other: .....                     | <input type="radio"/>    |                 |
| <b>B3</b> | How well cooked is the pork meat that you eat?<br>?   | Uncooked (raw) /                 | <input type="checkbox"/> | <b>Go to B5</b> |
|           |                                                       | Cooked (red/pink in the middle)  | <input type="checkbox"/> |                 |
|           |                                                       | Cooked (brown/grey throughout) / | <input type="checkbox"/> |                 |
| <b>B4</b> | If uncooked, how often do you eat uncooked meat?<br>? | Always /                         | <input type="radio"/>    |                 |
|           |                                                       | Often/                           | <input type="radio"/>    |                 |
|           |                                                       | Sometimes/                       | <input type="radio"/>    |                 |



|           |                                                                             |                                       |                          |                 |
|-----------|-----------------------------------------------------------------------------|---------------------------------------|--------------------------|-----------------|
| <b>B5</b> | From where do you get the pork meat that your family consumes?              | Own pigs/                             | <input type="checkbox"/> |                 |
|           |                                                                             | Neighbors' pigs/                      | <input type="checkbox"/> |                 |
|           |                                                                             | Market/                               | <input type="checkbox"/> |                 |
|           |                                                                             | Other/ : .....                        | <input type="checkbox"/> |                 |
| <b>B6</b> | Have you ever seen cysts in the pork meat when preparing it? (Picture)      | Yes / -                               | <input type="radio"/>    | <b>Go to B8</b> |
|           |                                                                             | No /                                  | <input type="radio"/>    |                 |
| <b>B7</b> | If yes, what do you do with the meat?                                       | Eat it like normal meat/              | <input type="radio"/>    |                 |
|           |                                                                             | Cook it extra well /                  | <input type="radio"/>    |                 |
|           |                                                                             | Cut off the bad part and eat the rest | <input type="radio"/>    |                 |
|           |                                                                             | Don't eat any of it/                  | <input type="radio"/>    |                 |
| <b>B8</b> | What kind of toilet do you have?                                            | Flushing toilet connected to sewer    | <input type="radio"/>    |                 |
|           |                                                                             | Pit latrine/                          | <input type="radio"/>    |                 |
|           |                                                                             | Bucket toilet/                        | <input type="radio"/>    |                 |
|           |                                                                             | Bush/field toilet/                    | <input type="radio"/>    |                 |
|           |                                                                             | Don't have one/                       | <input type="radio"/>    |                 |
|           |                                                                             | Other/ : .....                        | <input type="radio"/>    |                 |
| <b>B9</b> | Observational question: Can the pigs come in contact with the toilet/stool? | Yes / /                               | <input type="radio"/>    |                 |



|            |                                                                |                                |                          |  |
|------------|----------------------------------------------------------------|--------------------------------|--------------------------|--|
|            | ?                                                              | No/                            | <input type="radio"/>    |  |
|            |                                                                | Most of the times/             | <input type="radio"/>    |  |
|            |                                                                | Not so often/                  | <input type="radio"/>    |  |
|            |                                                                | No, never/                     | <input type="radio"/>    |  |
| <b>B10</b> | Do you and your family wash your hands before eating?<br><br>? | Yes, always/                   | <input type="radio"/>    |  |
|            | Most of the times/                                             | <input type="radio"/>          |                          |  |
|            | Not so often/                                                  | <input type="radio"/>          |                          |  |
|            | No, never/                                                     | <input type="radio"/>          |                          |  |
| <b>No</b>  | <b>C. Farm details/</b>                                        |                                |                          |  |
| <b>C1</b>  | Number of pigs (at time of visit)<br>(                         | Piglets/ (< 1 month): .....    |                          |  |
|            |                                                                | Growers/ (1-3 months): .....   |                          |  |
|            |                                                                | Fatteners/ (> 3 months): ..... |                          |  |
|            |                                                                | Breeding sows/ : .....         |                          |  |
|            |                                                                | Breeding boars/ : .....        |                          |  |
| <b>C2</b>  | Pig breed(s) on the farm                                       | Indigenous pigs/               | <input type="checkbox"/> |  |
|            |                                                                | Commercial pigs/               | <input type="checkbox"/> |  |
| <b>C3</b>  | Housing system for the pigs                                    | Tethered/ /                    | <input type="checkbox"/> |  |
|            |                                                                | Confined in pens/              | <input type="checkbox"/> |  |



|    |                                                                                        |                         |                          |             |
|----|----------------------------------------------------------------------------------------|-------------------------|--------------------------|-------------|
|    |                                                                                        | Partly confined/        | <input type="checkbox"/> | Go to<br>C6 |
|    |                                                                                        | Free roaming/           | <input type="checkbox"/> |             |
| C4 | Which group(s) of pigs are tethered/confined?                                          | Piglets/ (< 1 month)    | <input type="checkbox"/> |             |
|    | /                                                                                      | Growers/ (1-3 months)   | <input type="checkbox"/> |             |
|    |                                                                                        | Fatteners/ (> 3 months) | <input type="checkbox"/> |             |
|    |                                                                                        | Breeding sows/          | <input type="checkbox"/> |             |
|    |                                                                                        | Breeding boars/         | <input type="checkbox"/> |             |
| C5 | If partly confined, what time of the day are the pigs kept confined?                   | Day time/               | <input type="checkbox"/> |             |
|    |                                                                                        | Dusk/                   | <input type="checkbox"/> |             |
|    |                                                                                        | Night time/             | <input type="checkbox"/> |             |
|    |                                                                                        | Other/ : .....          | <input type="checkbox"/> |             |
| C6 | If partly confined/free roaming, during which season do the pigs roam free?<br>?       | Dry season/             | <input type="radio"/>    |             |
|    |                                                                                        | Rainy season/           | <input type="radio"/>    |             |
|    |                                                                                        | Both/                   | <input type="radio"/>    |             |
| C7 | Do you feed your pigs with kitchen waste or other food waste from markets/restaurants? | Yes/ /                  | <input type="radio"/>    |             |
|    |                                                                                        | Sometimes /             | <input type="radio"/>    |             |



|    |                                                                    |              |                       |          |
|----|--------------------------------------------------------------------|--------------|-----------------------|----------|
|    | ?                                                                  | No/          | <input type="radio"/> | Go to D1 |
| C8 | If yes, does it ever contain meat?                                 | Don't know / | <input type="radio"/> |          |
|    |                                                                    | Yes/ /       | <input type="radio"/> |          |
|    |                                                                    | No/          | <input type="radio"/> | Go to D1 |
| C9 | Do you cook the food waste before feeding it to the pigs?<br><br>? | Yes/ /       | <input type="radio"/> |          |
|    |                                                                    | Sometimes /  | <input type="radio"/> |          |
|    |                                                                    | No/          | <input type="radio"/> |          |

|    |                                                          |                        |                          |          |
|----|----------------------------------------------------------|------------------------|--------------------------|----------|
| No | <i>D. Disease knowledge and vaccination/</i>             |                        |                          |          |
| D1 | Have you heard about Trichinellosis?<br><br>?            | Yes / /                | <input type="radio"/>    | Go to D7 |
|    |                                                          | No/                    | <input type="radio"/>    |          |
| D2 | Can you explain what it is?                              | Yes/ / : .....         | <input type="radio"/>    |          |
|    |                                                          | No/                    | <input type="radio"/>    |          |
| D3 | Who can get infected? <i>Don't read options out loud</i> | Humans/                | <input type="checkbox"/> |          |
|    |                                                          | Pigs/                  | <input type="checkbox"/> |          |
|    |                                                          | Other animals/ : ..... | <input type="checkbox"/> |          |
|    | If answering "humans":                                   | Yes/ / : .....         | <input type="radio"/>    |          |



|            |                                                                                |                            |                          |  |
|------------|--------------------------------------------------------------------------------|----------------------------|--------------------------|--|
| <b>D4</b>  | Do you know how people get infected?<br><br>?                                  | No/                        | <input type="radio"/>    |  |
| <b>D5</b>  | Has anyone in your family or anyone else you know had Trichinellosis?<br><br>? | Yes, someone in the family | <input type="checkbox"/> |  |
|            |                                                                                | Yes, someone else          | <input type="checkbox"/> |  |
|            |                                                                                | No/                        | <input type="radio"/>    |  |
| <b>D6</b>  | If answering "pigs":<br><br>Do you know how pigs get infected?<br><br>?        | Yes/ / : .....             | <input type="radio"/>    |  |
|            |                                                                                | No/                        | <input type="radio"/>    |  |
| <b>D7</b>  | Have you heard about Cysticercosis?<br><br>( ) ?                               | Yes/ / : .....             | <input type="radio"/>    |  |
|            |                                                                                | No/                        | <input type="radio"/>    |  |
| <b>D8</b>  | Can you explain what it is?                                                    | Yes/ / : .....             | <input type="radio"/>    |  |
|            |                                                                                | No/                        | <input type="radio"/>    |  |
| <b>D9</b>  | Who can get infected? <i>Don't read options out loud</i><br><br>( !!!!)        | Humans/                    | <input type="checkbox"/> |  |
|            |                                                                                | Pigs/                      | <input type="checkbox"/> |  |
|            |                                                                                | Other animals/ : .....     | <input type="checkbox"/> |  |
| <b>D10</b> | If answering "humans":                                                         | Yes/ / : .....             | <input type="radio"/>    |  |



|     |                                                                                   |                            |                          |                 |
|-----|-----------------------------------------------------------------------------------|----------------------------|--------------------------|-----------------|
|     | Do you know how people get infected?<br><br>?                                     | No/                        | <input type="radio"/>    |                 |
| D11 | Has anyone in your family or anyone else you know had Cysticercosis?<br><br>( ) ? | Yes, someone in the family | <input type="checkbox"/> |                 |
|     |                                                                                   | Yes, someone else          | <input type="checkbox"/> |                 |
|     |                                                                                   | No/                        | <input type="radio"/>    |                 |
| D12 | If answering "pigs":<br><br>Do you know how pigs get infected?<br><br>?           | Yes/ / : .....             | <input type="radio"/>    |                 |
|     |                                                                                   | No/                        | <input type="radio"/>    |                 |
| D13 | Do you treat the pigs with antiparasitic medicines?<br><br>?                      | Yes/ / : .....             | <input type="radio"/>    | Go<br>To<br>D15 |
|     |                                                                                   | No/                        | <input type="radio"/>    |                 |
|     |                                                                                   | Don't know/                | <input type="radio"/>    |                 |
| D14 | If yes, how often?<br><br>?                                                       | Every week/                | <input type="radio"/>    |                 |
|     |                                                                                   | Every month/               | <input type="radio"/>    |                 |
|     |                                                                                   | Every year/                | <input type="radio"/>    |                 |
|     |                                                                                   | Other/ : .....             | <input type="radio"/>    |                 |
| No  | G. Animal movement/                                                               |                            |                          |                 |
| G8  | Do you slaughter pigs at home?                                                    | Yes/ / : .....             | <input type="radio"/>    |                 |





|           |                                       |                  |                          |                      |
|-----------|---------------------------------------|------------------|--------------------------|----------------------|
|           |                                       | No/              | <input type="radio"/>    | <b>Go to<br/>G10</b> |
| <b>G9</b> | If yes, what do you do with the meat? | Own consumption/ | <input type="checkbox"/> |                      |
|           |                                       | Sell to others/  | <input type="checkbox"/> |                      |
|           |                                       | Other: .....     | <input type="checkbox"/> |                      |

Blood sample form

Farm no/ : ..... (Example: F1) Pig no/ : ..... (Example: P1)

| Sex/   |                       | Age/            | Breed/     |                       |
|--------|-----------------------|-----------------|------------|-----------------------|
| Female | <input type="radio"/> | .....<br>months | Indigenous | <input type="radio"/> |
| Male   | <input type="radio"/> | .....<br>years  | Commercial | <input type="radio"/> |
